# Supplementary material
Source: PubMed Central journal article supplement (PMC4743064)
Supplement: NIHMS67048-supplement-Supplementary_Figure_1.pdf [file NIHMS67048-supplement-Supplementary_Figure_1.pdf]

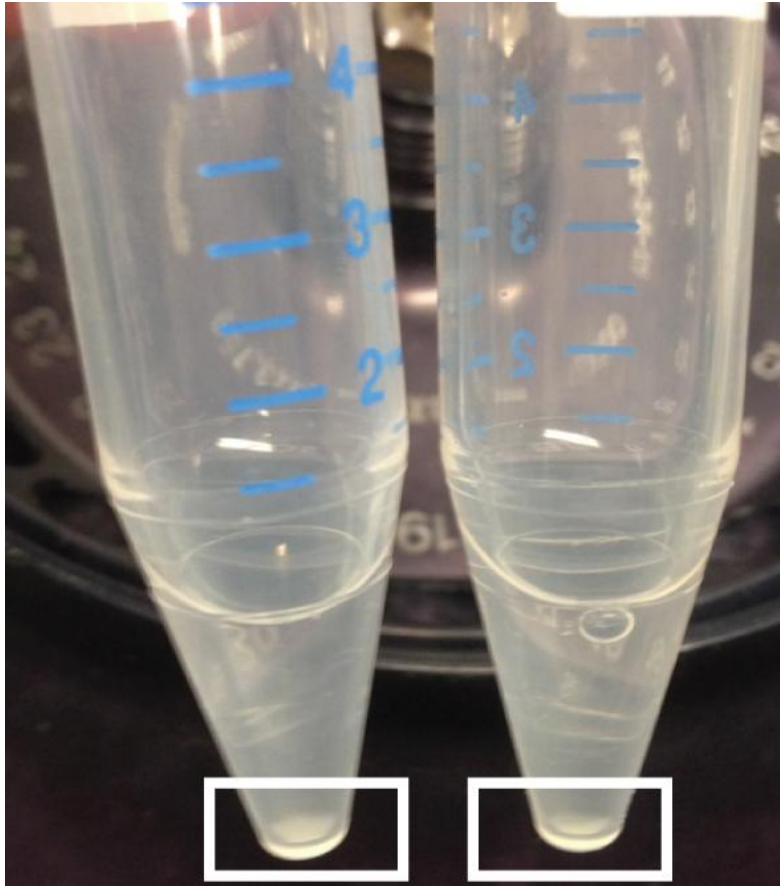

**Supplementary Figure 1**

Examples of expected cell pellet size (white pellet highlighted in white boxes) after the extraction step.
